# Supplementary material for: Ultrasonic Treatment of Corn Starch to Improve the Freeze-Thaw Resistance of Frozen Model Dough and Its Application in Steamed Buns
Source: MDPI journal article supplement (doi:10.3390/foods12101962), 2023-05-12
Supplement: s1 [file s1]

## Supplementary Materials:

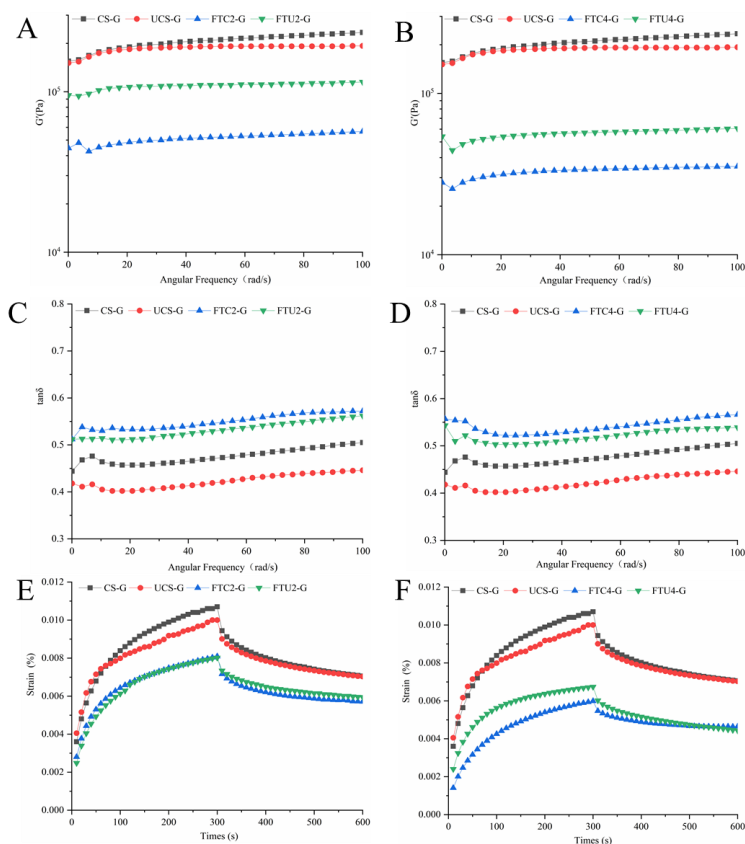

Figure S1. The elastic modulus, loss angle tangent and creep recovery curves of ultrasonically modified corn starch model dough at 2,4 freeze-thaw cycles. A-B is the elastic modulus, C-D is the loss angle tangent and E-F is the creep recovery curve.

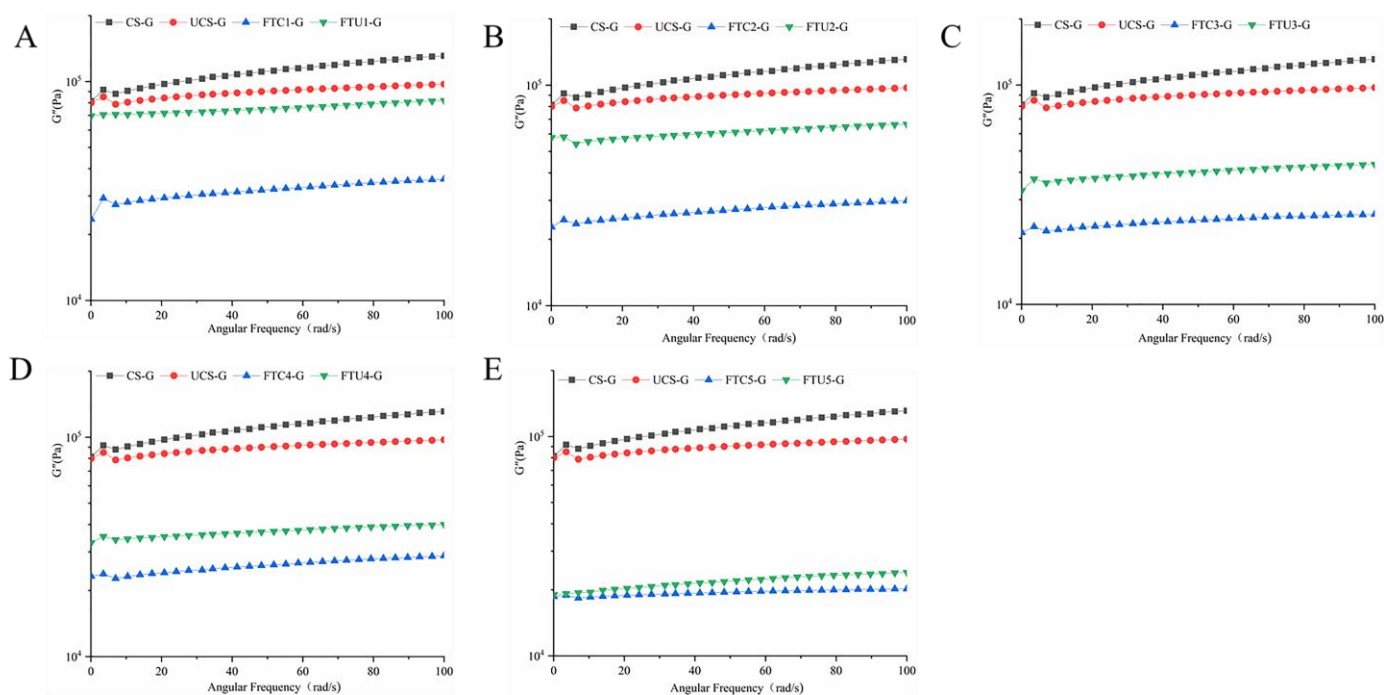

Figure S2. Viscosity modulus of ultrasonically modified corn starch model doughs under different number of freeze-thaw cycles

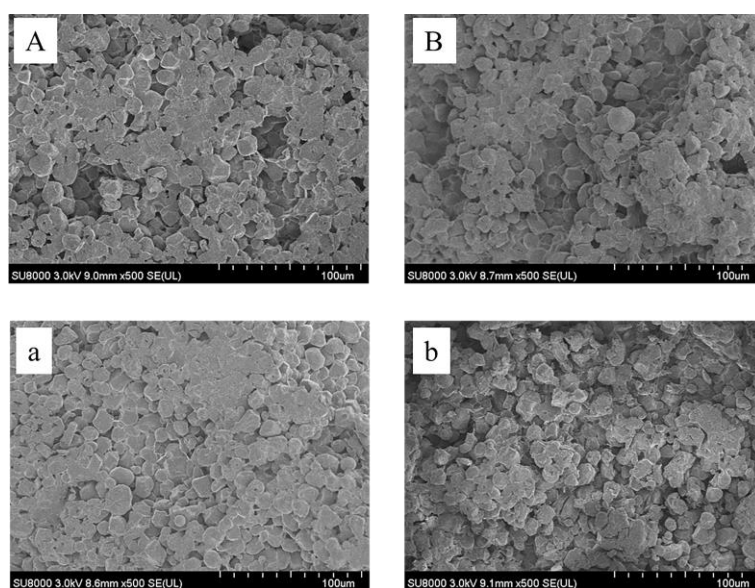

Figure S3. Scanning electron micrographs of ultrasonically modified corn starch model dough at 2,4 freeze-thaw cycles.
